# Supplementary material
Source: Royal Society of Chemistry journal article supplement (doi:10.1039/d5tb02128f)
Supplement: d5tb02128f1.pdf [file d5tb02128f1.pdf]

## Supplementary Information

### Glucagon-like peptide-1 mimotopes screened from an Fv- antibody library

Hyung Eun Bae<sup>a</sup>, Dayoung Choi<sup>b</sup>, Jeong Soo Sung<sup>a</sup>, Hyun Woong Lee<sup>c</sup>, Min-Jung Kang<sup>d</sup>,  
Joachim Jose<sup>e</sup>, Misu Lee<sup>b,\*</sup>, Jae-Chul Pyun<sup>a,\*</sup>

<sup>a</sup> Department of Materials Science and Engineering, Yonsei University, 50 Yonsei-Ro,  
Seodaemun-Gu, Seoul, 03722, Korea

<sup>b</sup> Division of Life Sciences, College of Life Science and Bioengineering, Incheon National  
University, Incheon, 22012, Korea

<sup>c</sup> Division of Gastroenterology, Gangnam Severance Hospital, Seoul, 06273, Korea

<sup>d</sup> Korea Institute of Science and Technology, Seoul, 02456, Korea.

<sup>e</sup> Institute of Pharmaceutical and Medical Chemistry, University of Munster, Münster, 48149,  
Germany

\*Corresponding authors: Jae-Chul Pyun (Tel.: +82 2 2293 5509; Fax: 82 2 312 5375; E-mail:  
jcpyun@yonsei.ac.kr) and Misu Lee (E-mail: misulee@inu.ac.kr)

**Figure S1.** Analytical RP-HPLC and MS characterization of GLP-1R agonist reference peptides. (a) GLP-1 (7–36) amide (human), left: analytical RP-HPLC chromatogram monitored at 230 nm; right: MALDI-TOF MS spectrum. (b) Semaglutide, left: analytical RP-HPLC chromatogram monitored at 230 nm; right: MS spectrum. (c) Tirzepatide, left: analytical RP-HPLC chromatogram monitored at 230 nm; right: MS spectrum.

(a)

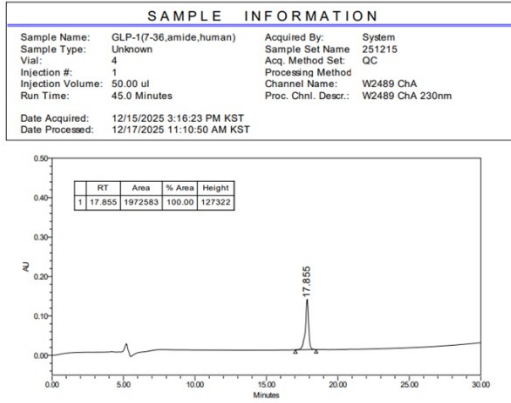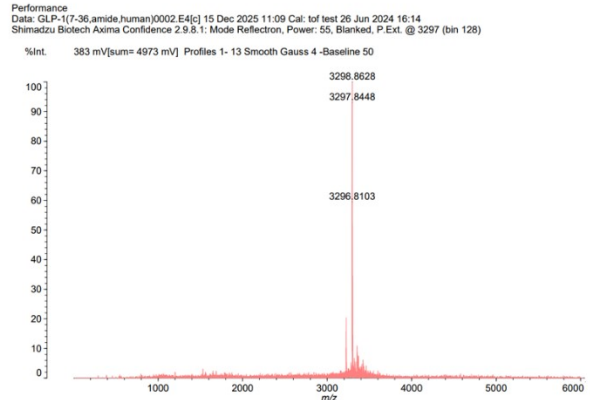

(b)

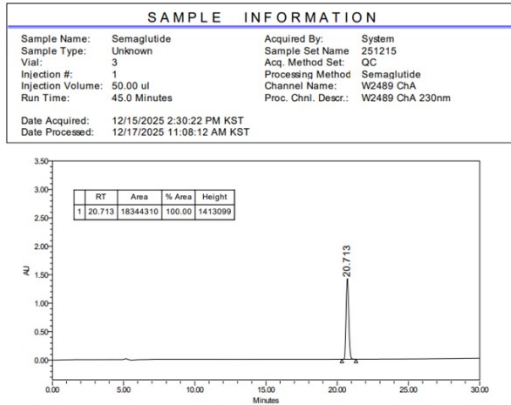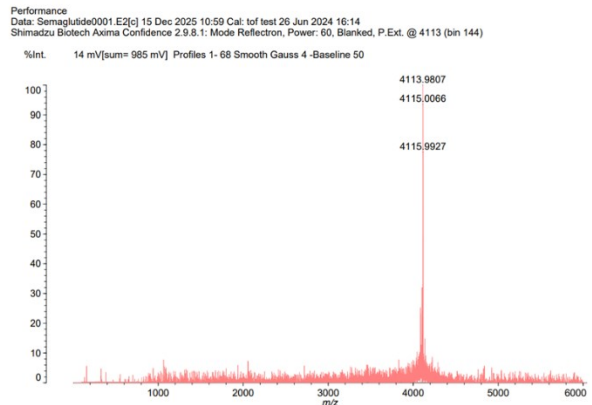

(c)

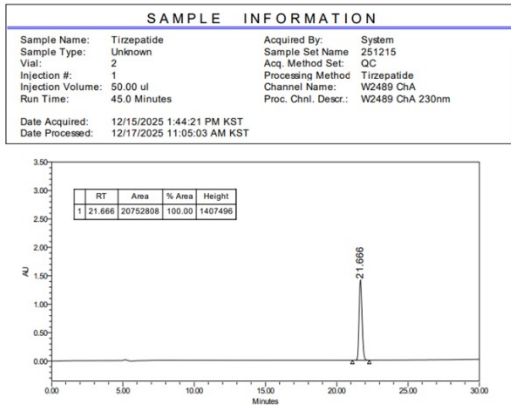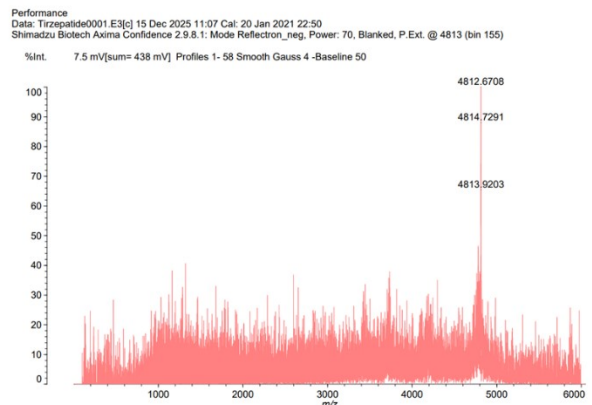

**Figure S2.** The binding affinities of screened clone-5 and clone-8 determined via flow cytometry.

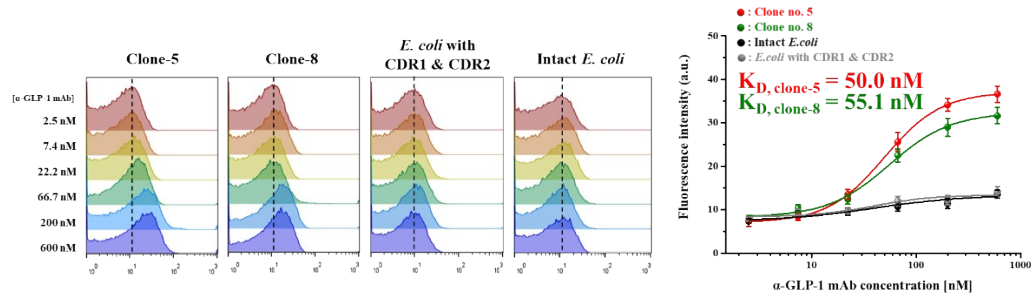

**Figure S3.** SPR-based binding characterization of GLP-1 mimotopes and GLP-1R agonist benchmarks. (a) Binding analysis of expressed Fv-antibodies using an SPR biosensor, followed by  $K_D$  determination based on dose–response curves. (b) Binding analysis of synthesized peptides using an SPR biosensor, followed by  $K_D$  determination based on dose–response curves. (c) Binding analysis of Exendin-4 (Ex-4), GLP-1 (7-36), semaglutide, and tirzepatide using an SPR biosensor, followed by  $K_D$  determination based on dose-response curves.

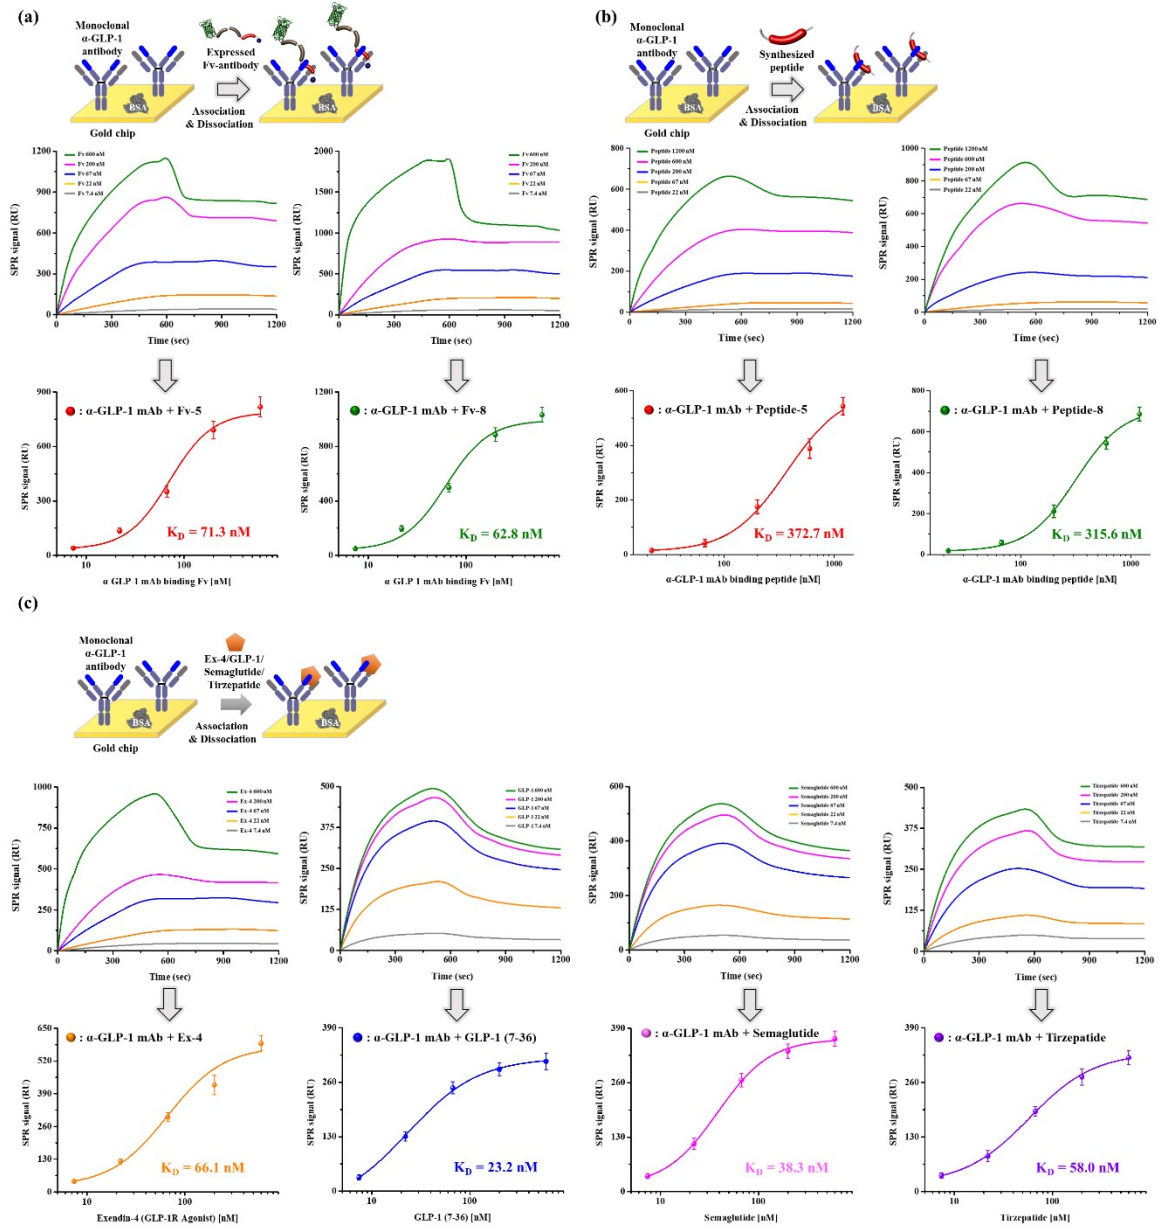

**Figure S4.** Analysis of competitive binding between Fv mimotopes and GLP-1 in beta-TC-6 cells using FACS. (top: Fv-5; bottom: Fv-8)

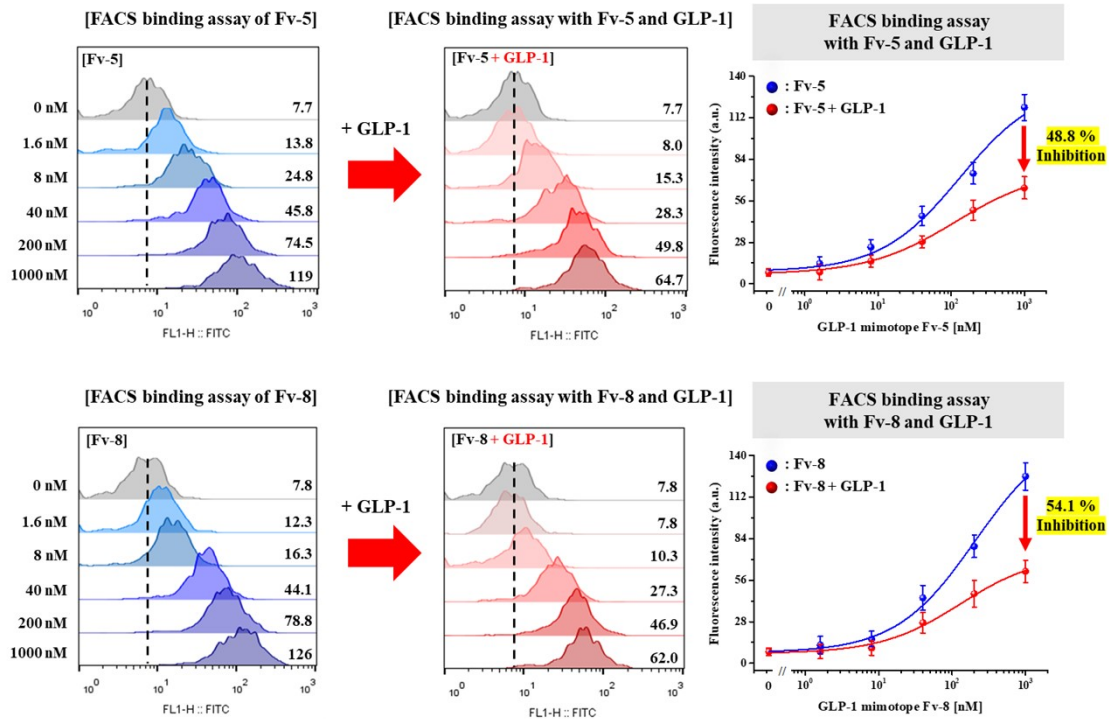

**Table S1.** V<sub>H</sub> framework and CDR1–CDR3 amino acid sequences of the synthetic template, Fv-5, and Fv-8.

| Region  | Amino acid sequence (N → C)                                     |                                                                 |                                                                 |
|---------|-----------------------------------------------------------------|-----------------------------------------------------------------|-----------------------------------------------------------------|
|         | Synthetic template                                              | Fv-5                                                            | Fv-8                                                            |
| Frame-1 | EVQLVESAAEVRPPGASVKITCKASGYDFS                                  | EVQLVESAAEVRPPGASVKITCKASGYDFS                                  | EVQLVESAAEVRPPGASVKITCKASGYDFS                                  |
| CDR1    | TYGIQ                                                           | TYGIQ                                                           | TYGIQ                                                           |
| Frame-2 | WMRQAPGQRPEWLG                                                  | WMRQAPGQRPEWLG                                                  | WMRQAPGQRPEWLG                                                  |
| CDR2    | WIHAGTGGTKYSRKFQG                                               | WIHAGTGGTKYSRKFQG                                               | WIHAGTGGTKYSRKFQG                                               |
| Frame-3 | RITITRDTSAANTVYLDLNSLTSEDVAVYYCAR                               | RITITRDTSAANTVYLDLNSLTSEDVAVYYCAR                               | RITITRDTSAANTVYLDLNSLTSEDVAVYYCAR                               |
| CDR3    | <sup>1</sup> D-K-V-T-V- <sup>6</sup> W-A-C-Q-D- <sup>11</sup> N | <sup>1</sup> G-A-P-G-T- <sup>6</sup> R-L-H-G-D- <sup>11</sup> F | <sup>1</sup> C-S-P-G-G- <sup>6</sup> N-R-V-R-D- <sup>11</sup> F |
| Frame-4 | WGQGTTVTVSS                                                     | WGQGTTVTVSS                                                     | WGQGTTVTVSS                                                     |
